# Supplementary material for: Transcriptional changes when Myxococcus xanthus preys on Escherichia coli suggest myxobacterial predators are constitutively toxic but regulate their feeding
Source: PubMed Central journal article supplement (PMC5857379; doi:10.1099/mgen.0.000152), 2018-01-18

Multi-dimensional scaling plot of predator gene expression in nutrient medium, starvation medium, and with LIVE and DEAD prey.

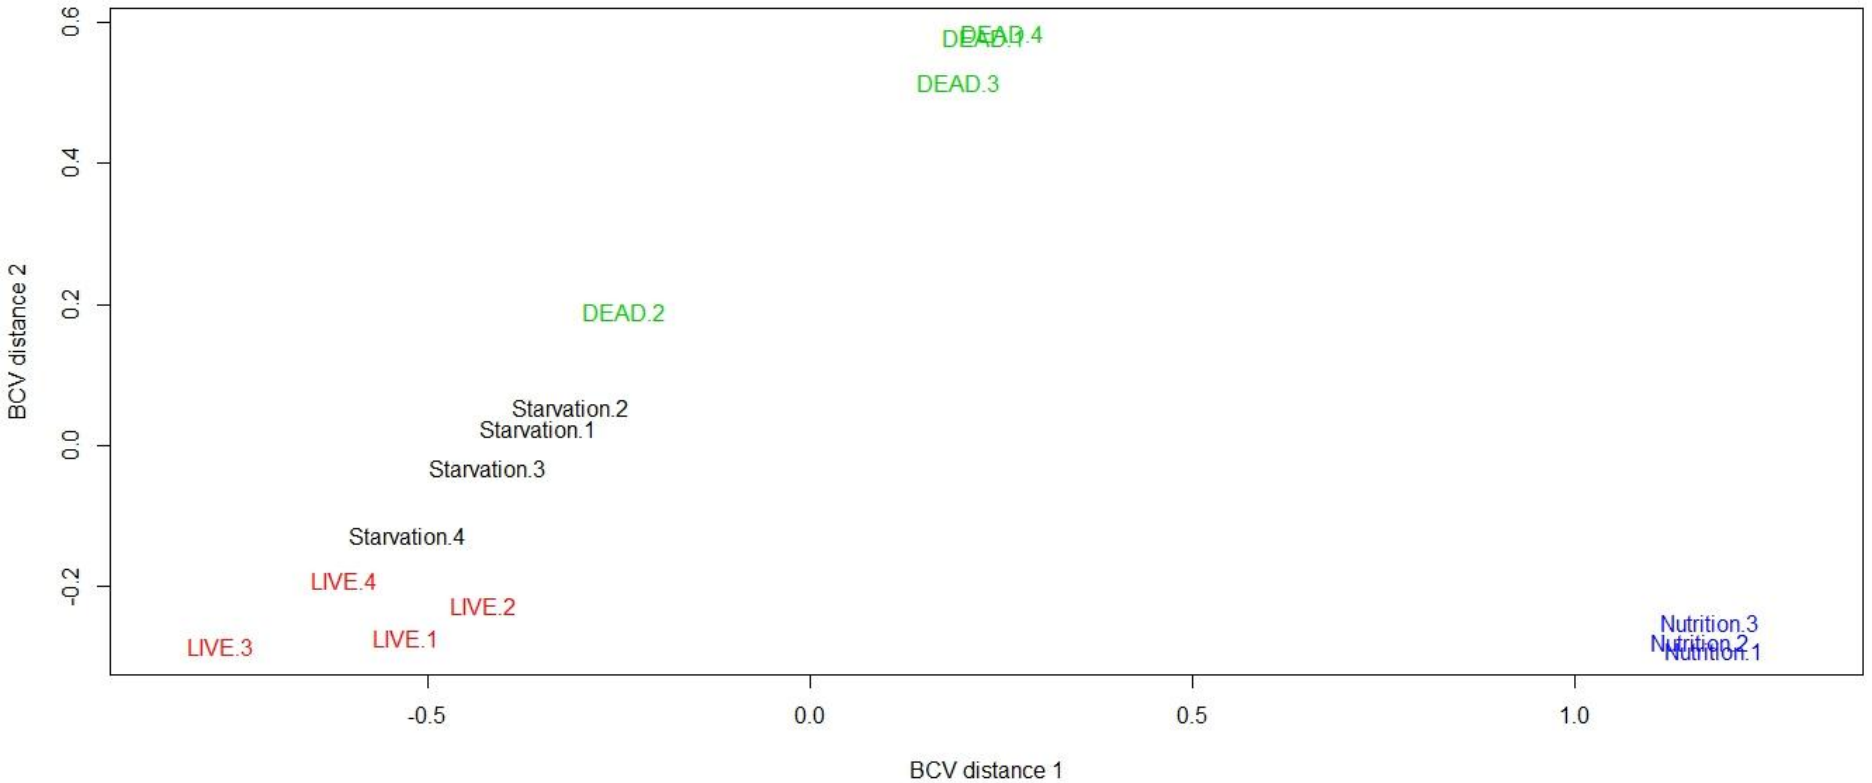

Multi-dimensional scaling plot of prey gene expression, in starvation medium, nutrient medium, and in the presence of predator (LIVE).

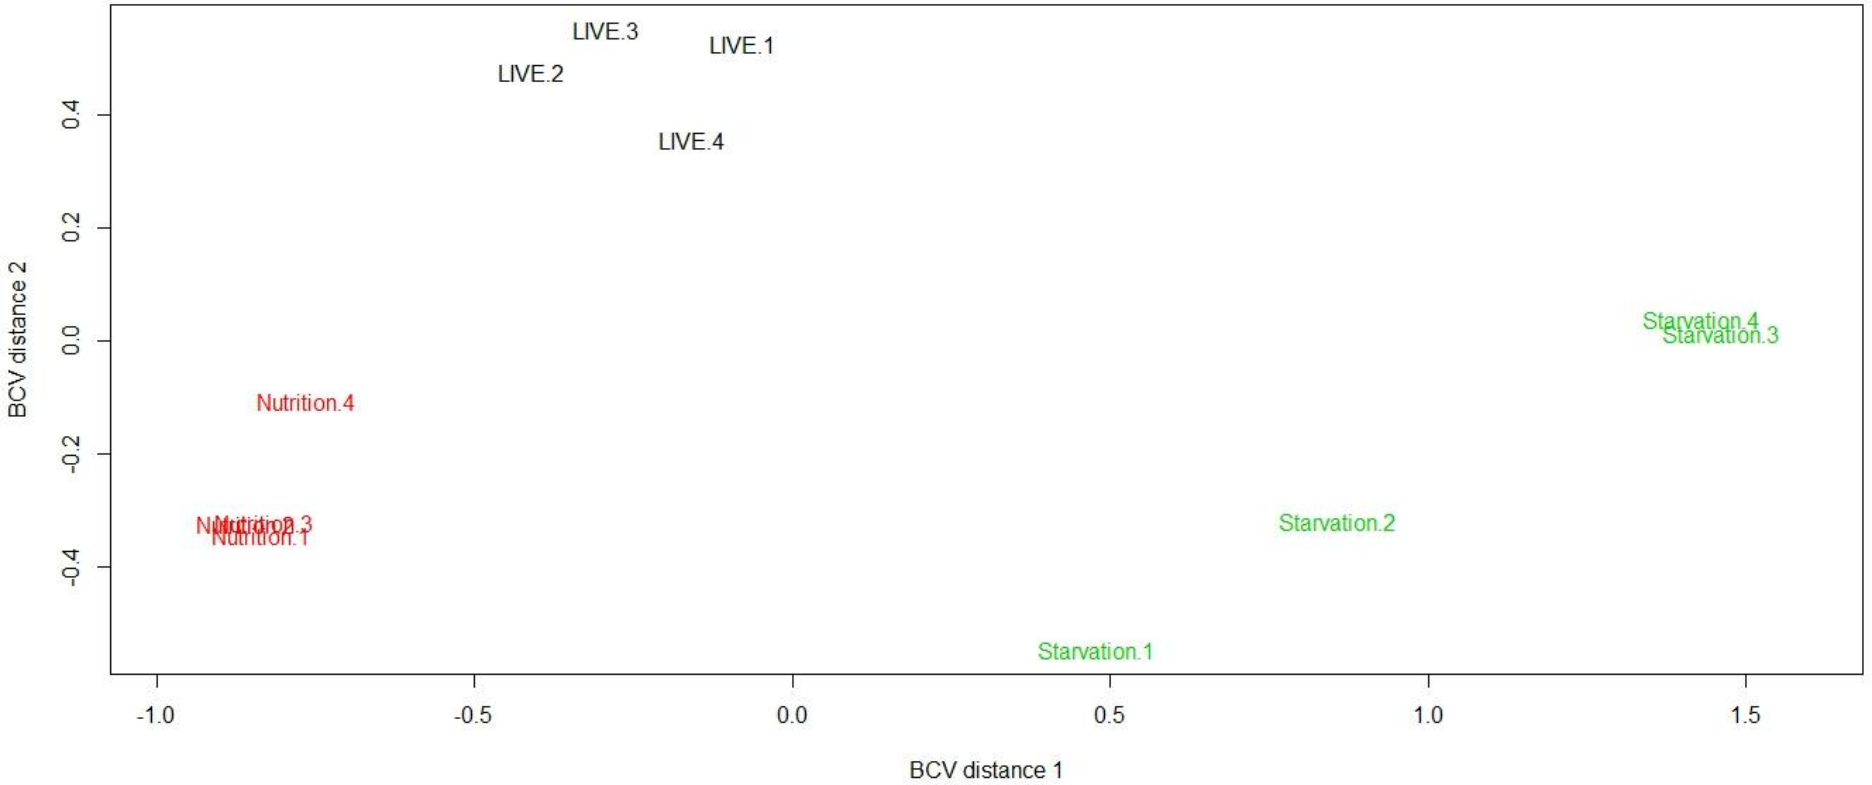

# Multi-dimensional scaling plot of prey gene expression, in starvation medium, and in the presence of predator OMVs and culture supernatant.

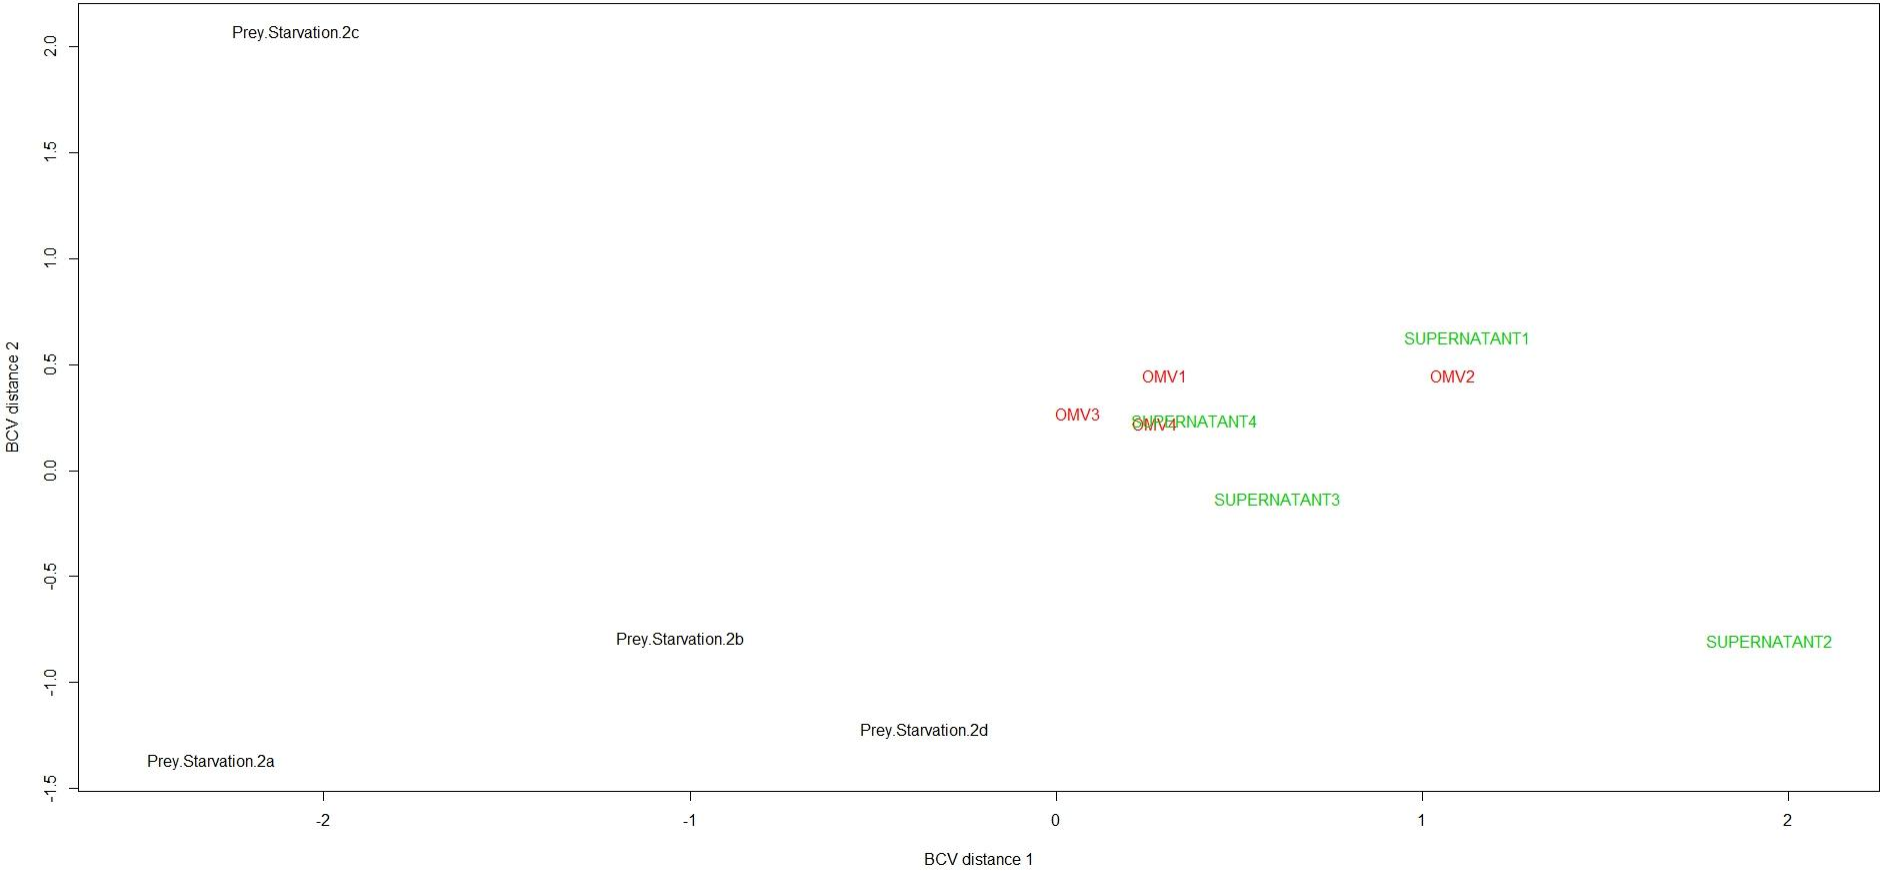

Supplement: mgen-4-152-s002.pdf [file mgen-4-152-s002.pdf]
